# Supplementary material
Source: Royal Society of Chemistry journal article supplement (doi:10.1039/d6ta01606e)
Supplement: d6ta01606e1.pdf [file d6ta01606e1.pdf]

## *Supporting Information*

### **Linkage-Enabled $\pi$ -Conjugation Engineering in an Oxime-Based Nickel Covalent Organic Framework Unlocks Efficient Oxygen Activation**

*Dekang Huang<sup>a</sup>, Xiaodong Zhao<sup>a</sup>, Huaji Pang<sup>a</sup>, Hongyu Chen<sup>a</sup>, Yunxiang Li<sup>b</sup>,  
Dingtang Li<sup>c</sup>, Lin Gao<sup>d</sup>, Ming Lei<sup>e</sup>, Lijuan Fu<sup>a</sup>, Yonggang Xiang<sup>a\*</sup>*

<sup>a</sup>Hubei Key Laboratory of Agricultural Functional Materials, College of Chemistry, Huazhong Agricultural University, Wuhan 430070, PR China

<sup>b</sup>Engineering Research Center of Photoenergy Utilization for Pollution Control and Carbon Reduction, Ministry of Education, College of Chemistry, Central China Normal University, Wuhan 430079, PR China

<sup>c</sup>State Key Laboratory of Agricultural Microbiology Core Facility, Huazhong Agricultural University, Wuhan 430070, PR China

<sup>d</sup>Hubei Key Laboratory of Energy Storage and Power Battery, School of Optoelectronic Engineering, School of New Energy, Hubei University of Automotive Technology, Shiyan 442002, PR China

<sup>e</sup>College of Resources and Environmental Science, South-Central Minzu University, Wuhan 430074, PR China

E-mail: ygxiang@mail.hzau.edu.cn (Y. Xiang)

## Table of Contents

|                                                       |    |
|-------------------------------------------------------|----|
| 1. General information .....                          | 1  |
| 1.1 Chemicals .....                                   | 1  |
| 1.2 Characterization methods .....                    | 1  |
| 1.3 Electrochemical measurements .....                | 2  |
| 1.4 Photocatalytic oxidation of TMB .....             | 3  |
| 1.5 Photocatalytic degradation of ciprofloxacin ..... | 3  |
| 2. Synthetic procedures .....                         | 5  |
| 2.1 Synthesis of small molecules .....                | 5  |
| 2.2 Synthesis of I-Ni-COF .....                       | 7  |
| 2.3 Synthesis of NQ-Ni-COF .....                      | 8  |
| 3. Characterization .....                             | 8  |
| 4. Copies of NMR spectra .....                        | 21 |

## **1. General information**

### **1.1 Chemicals**

Unless otherwise noted, all the chemicals were purchased in analytical purity from commercial suppliers and used directly without further purification.

### **1.2 Characterization methods**

Powder X-ray diffraction (PXRD) patterns were collected on a Bruker D8 Advance diffractometer with Cu K $\alpha$  radiation ( $2\theta$  range: 2-30°; Scan step size: 0.02°; Time per step: 1 s). Liquid-state  $^1\text{H}$  NMR and  $^{13}\text{C}$  NMR were recorded on Bruker Avance 600 MHz and 150 MHz spectrometers at 298 K, respectively, and chemical shift ( $\delta$ ) was reported in ppm with residual solvent peak as the reference. Peaks are reported as follows: s = singlet, d = doublet, t = triplet, q = quartet, m = multiplet or unresolved, with coupling constants in Hz. Fourier transform infrared (FT-IR) spectra were collected on a Nicolet 6700 spectrometer (Thermo Scientific, USA) equipped with an ATR cell. In situ diffuse reflectance infrared Fourier transform spectroscopy (DRIFTS) measurements were performed using a Bruker INVENIO S Fourier Transform Infrared Spectrometer equipped with a Harrick diffuse reflectance accessory. The specific Brunauer-Emmett-Teller (BET) surface area and pore size distribution were measured using a BSD-PM1 instrument at 77 K. High resolution transmission electron microscope (HRTEM) images were obtained on a JEOL JEM-F200 instrument. Scanning electron microscopy (SEM) images were collected using a Hitachi SU 8010 microscope. Solid-state  $^{13}\text{C}$  cross polarization magic angle spinning ( $^{13}\text{C}$ -CP/MAS) NMR spectra were collected on a Bruker Avance III HD 400 spectrometer. X-ray photoelectron spectroscopy (XPS) measurements were performed

on a Thermo ESCALAB 250 spectrometer with C 1s (284.6 eV) as the reference line. Solid-state diffuse reflectance UV-vis spectra were collected on a Shimadzu UV 3600 spectrophotometer with BaSO<sub>4</sub> as the reference. The generation of reactive oxygen species (ROS) was determined by electron spin resonance (ESR) spectra, which were recorded on a EPR200-Plus spectrometer. The concentrations of CIP were quantified by a high-performance liquid chromatography (HPLC) (Alliance e2695). The intermediate products were resolved by a high-resolution mass spectrometer (HRMS, Thermo Scientific Q Exactive). X-ray absorption spectroscopy (XAS) measurements were conducted a TableXAFS-500 apparatus (Anhui Chuangpu Instrument Technology Co., Ltd.). Ni leaching was tested by inductively coupled plasma mass spectrometry (ICP-MS, Agilent 5800 ICP-OES).

### **1.3 Electrochemical measurements**

Electrochemical measurements were performed on a CHI760E workstation (Chenhua Instruments, China), and the standard three-electrode system included a platinum plate as the counter electrode, a commercial Ag/AgCl electrode as the reference electrode, and a working electrode. The working electrode was prepared as follows: 15 mg of sample was thoroughly mixed with 200  $\mu$ L isopropanol containing 5% Nafion, and the resulting suspension was carefully loaded on the ITO glass substrate and dried at 60  $^{\circ}$ C under vacuum for 1 h. 0.1 M Na<sub>2</sub>SO<sub>4</sub> aqueous solution was employed as the electrolyte for the photocurrent test while the aqueous solution containing 0.1 M KCl and 0.005 M K<sub>3</sub>[Fe(CN)<sub>6</sub>] was employed as the electrolyte for the electrochemical impedance spectroscopy (EIS) measurement. For Mott-Schottky

tests, the perturbation was 5 mV with frequencies of 1000, 2000, and 3000 Hz.

The open-circuit potential (OCP) decay following light-off reflects the surface charge recombination dynamics of trapped carriers. The average surface recombination rate can be obtained by fitting the decay curve with a first-order kinetic model.

$$\frac{E - E_{\text{ph}}}{E_0 - E_{\text{ph}}} = 1 - \exp(-K_{\text{r}}t)$$

where  $E$  is the open-circuit potential at any time,  $E_0$  is the stationary OCP value in the dark,  $E_{\text{ph}}$  is the photostationary OCP value, and  $k_{\text{r}}$  is the pseudo-first-order recombination rate constant.

#### **1.4 Photocatalytic oxidation of TMB**

25 mg of 3,3',5,5'-tetramethylbenzidine (TMB) was dissolved in 2.5 mL of ethanol. 200  $\mu\text{L}$  of TMB solution and 7 mg of COFs were added into 0.1 M HAc/NaAc buffer solution (20 mL, pH 4). After saturation of adsorption, the photocatalytic oxidation of TMB was carried out under the irradiation of a 300 W xenon lamp ( $\lambda > 420$  nm, PLS SXE300, Beijing Perfectlight Technology Co., Ltd.). TMB oxidation were evaluated by UV-vis measurements (the absorbance at 369 nm) at different time intervals.

#### **1.5 Photocatalytic degradation of ciprofloxacin**

The photocatalytic experiments were carried out using a 300 W xenon lamp ( $\lambda > 420$  nm, PLS SXE300, Beijing Perfectlight Technology Co., Ltd.). 10 mg of COFs were dispersed in 10 mL of 50 mg  $\text{L}^{-1}$  CIP aqueous solution by ultrasonication for 5 minutes to ensure uniform dispersion of the photocatalyst. The suspension was then stirred in the dark for 60 minutes to establish adsorption-desorption equilibrium. Subsequently,

photocatalytic reactions were conducted under xenon lamp irradiation for another 60 minutes, with 500  $\mu\text{L}$  aliquots collected every 15 minutes. Throughout the experiment, the system was maintained under an oxygen atmosphere. The collected samples were filtered through a nylon syringe filter with a pore size of 0.22  $\mu\text{m}$  and then injected into HPLC vials for analysis. The degradation efficiency of ciprofloxacin was calculated according to the following equation.

$$\text{Degradation efficiency (\%)} = \left(1 - \frac{C_t}{C_0}\right) \times 100\%$$

Where  $C_0$  represents the concentration of CIP after reaching adsorption-desorption equilibrium following 60 minutes of dark treatment, while  $C_t$  denotes the residual concentration of CIP at a given irradiation time.

The photocatalytic degradation of CIP follows first-order reaction kinetics, which can be described by the following equation:

$$\ln \frac{C_t}{C_0} = kt$$

Where  $k$  is the apparent reaction rate constant and  $t$  is the reaction time.

## 2. Synthetic procedures

### 2.1 Synthesis of small molecules

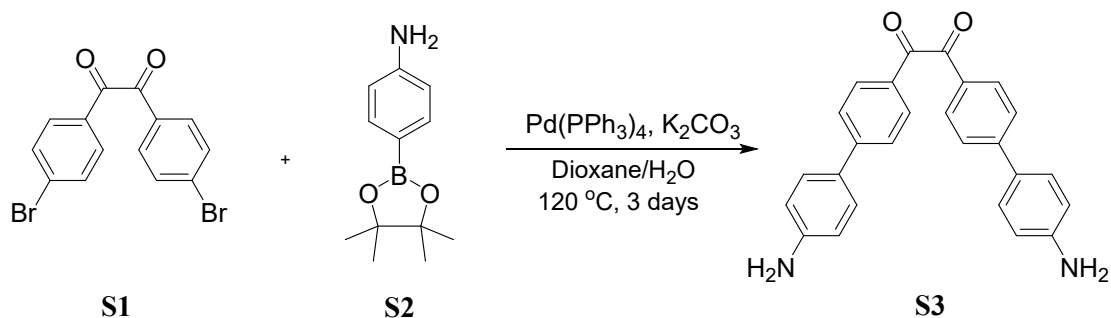

**Scheme S1.** Synthesis of S3.

**Synthesis of S3:** A mixture of 4,4'-dibromobenzil (**S1**, 2.0 g, 5.4 mmol), 4-aminophenylboronic acid pinacol ester (**S2**, 5.8 g, 26.5 mmol), Pd(PPh<sub>3</sub>)<sub>4</sub> (0.12 g, 0.1 mmol), and K<sub>2</sub>CO<sub>3</sub> (4.2 g, 30.4 mmol) in a solvent system of 1,4-dioxane (52 mL) and distilled water (14 mL) was placed in a round-bottom flask. The reaction mixture was stirred at 120 °C under an argon atmosphere for 3 days. After completion of the reaction, the mixture was cooled to room temperature and concentrated under reduced pressure to afford a solid residue. The crude product was successively washed with deionized water and methanol, followed by vacuum drying at 60 °C for 12 h to yield the target compound **S3**. <sup>1</sup>H NMR (DMSO-d<sub>6</sub>, 600 MHz) δ 7.89 (d, *J* = 8.4 Hz, 4H), 7.81 (d, *J* = 8.4 Hz, 4H), 7.51 (d, *J* = 8.4 Hz, 4H), 6.67 (d, *J* = 7.8 Hz, 4H), 5.55 (s, 4H). <sup>13</sup>C NMR (151 MHz, DMSO-d<sub>6</sub>) δ 194.47, 150.16, 147.32, 130.33, 129.41, 128.06, 125.60, 124.89, 114.21.

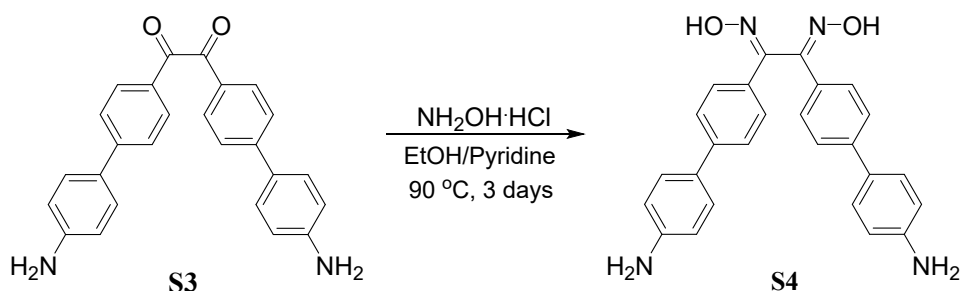

**Scheme S2.** Synthesis of **S4**.

**Synthesis of S4:** **S3** (1.0 g, 2.55 mmol), hydroxylamine hydrochloride ( $\text{NH}_2\text{OH}\cdot\text{HCl}$ , 1.76 g, 25.5 mmol), and a mixed solvent of pyridine (20 mL) and anhydrous ethanol (30 mL) were added to a round-bottom flask. The mixture was degassed with Ar for 10 min and then stirred at 90 °C under an Ar atmosphere for 3 days. After cooling to room temperature, the reaction was quenched by water (200 mL). The resulting suspension was filtered to afford a pale yellow precipitate **S4** (1.06 g, 2.5 mmol, 98%).  $^1\text{H}$  NMR (DMSO- $d_6$ , 600 MHz)  $\delta$  11.34 (s, 2H), 7.54 (d,  $J = 8.4$  Hz, 4H), 7.49 (d,  $J = 8.4$  Hz, 4H), 7.35 (d,  $J = 8.4$  Hz, 4H), 6.61 (d,  $J = 8.4$  Hz, 4H), 5.27 (s, 4H).  $^{13}\text{C}$  NMR (151 MHz, DMSO- $d_6$ )  $\delta$  151.18, 149.22, 141.96, 136.61, 130.54, 127.63, 126.97, 126.48, 114.62.

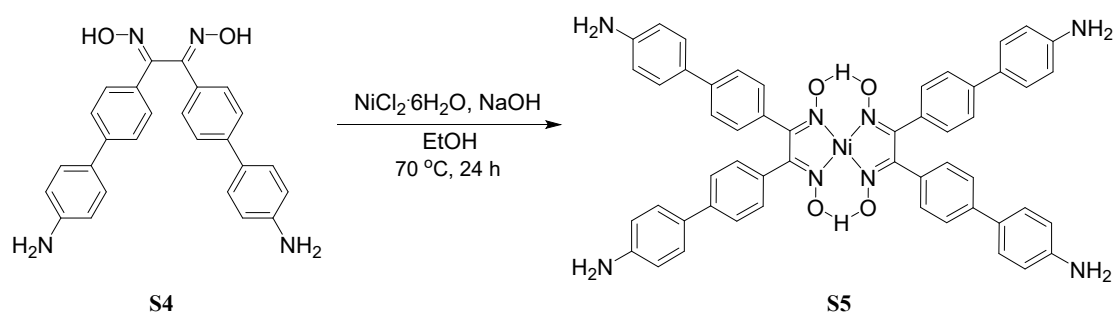

**Scheme S3.** Synthesis of **S5**.

**Synthesis of S5:** **S4** (0.5 g, 1.18 mmol) and sodium hydroxide (NaOH, 0.4 g, 10 mmol) were dissolved in anhydrous ethanol (50 mL) in a round-bottom flask and stirred for 10 min. A solution of nickel(II) chloride hexahydrate ( $\text{NiCl}_2\cdot 6\text{H}_2\text{O}$ , 0.14 g, 0.6 mmol) in

anhydrous ethanol (5 mL) was slowly added to the mixture. After degassing with Ar for 10 min, the reaction was stirred at 70 °C under an Ar atmosphere for 24 h. Upon cooling, the suspension was filtered to afford a brown precipitate **S5** (0.31 g, 0.34 mmol, 57%). <sup>1</sup>H NMR (DMSO-d<sub>6</sub>, 600 MHz) δ 7.54 (d, *J* = 8.4 Hz, 8H), 7.48 (d, *J* = 8.4 Hz, 8H), 7.35 (d, *J* = 8.4 Hz, 8H), 6.61 (d, *J* = 8.4 Hz, 8H), 5.26 (s, 8H). <sup>13</sup>C NMR spectra of **S5** can not be obtained because of its insufficient solubility in organic solvents. MS (HR-ESI): *m/z* Calc. C<sub>52</sub>H<sub>43</sub>N<sub>8</sub>O<sub>4</sub>Ni [M+H]<sup>+</sup> 901.2761, found 901.2764.

## 2.2 Synthesis of I-Ni-COF

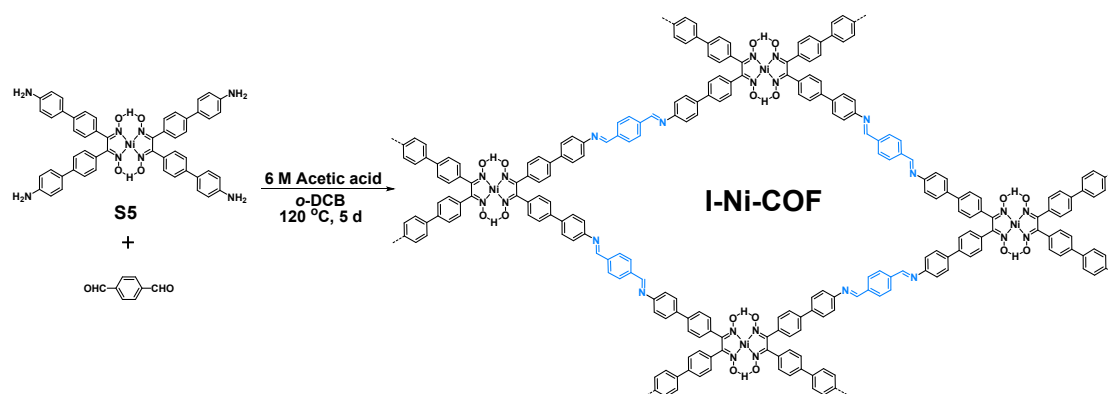

**Scheme S4.** Synthesis of **I-Ni-COF**.

A glass tube (10 mL) was charged with **S5** (27.1 mg, 0.03 mmol), terephthalaldehyde (11.3 mg, 0.06 mmol), 1,2-dichlorobenzene (1 mL), and HOAc (6 mol L<sup>-1</sup>, 0.2 mL). Subsequently, the tube was sonicated for 10 minutes, degassed by three freeze-pump-thaw cycles (liquid nitrogen), and sealed under vacuum. After being heated in an oven at 120 °C for 5 days, the cooled suspension was centrifuged to separate the solid, which was repeatedly washed by THF and CH<sub>3</sub>OH until the supernatant became colorless. **I-Ni-COF** was obtained as a green powder (33.6 mg) after being dried under vacuum at 80 °C.

### 2.3 Synthesis of NQ-Ni-COF

I-Ni-COF (50 mg), ethylene carbonate (40 mg, 0.46 mmol), [Cp\*RhCl<sub>2</sub>]<sub>2</sub> (5 mg, 0.0075 mmol), and i-PrOH (2.5 mL) were placed in a Pyrex glass tube (10 mL). The mixture was ultrasonicated for 5 min, degassed via three freeze-pump-thaw cycles (liquid nitrogen), and sealed under vacuum. The mixture was reacted at 110 °C for 12 h. After cooling to room temperature, the solid product was isolated by filtration under reduced pressure and sequentially washed with water and CH<sub>3</sub>OH. NQ-Ni-COF was obtained as a brown powder (30.5 mg) after dried under vacuum at 80 °C.

### 3. Characterization

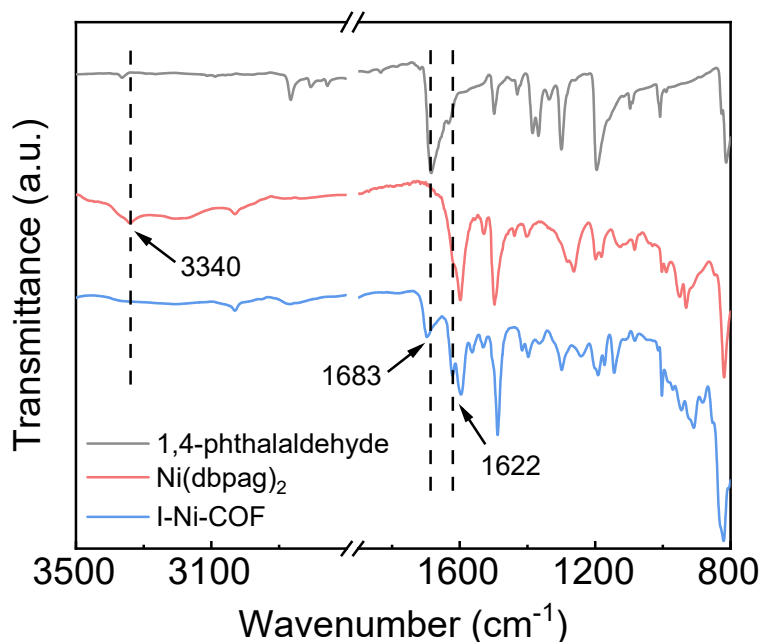

**Fig. S1** FT-IR spectra of 1,4-phthalaldehyde, Ni(dbpag)<sub>2</sub>, and I-Ni-COF.

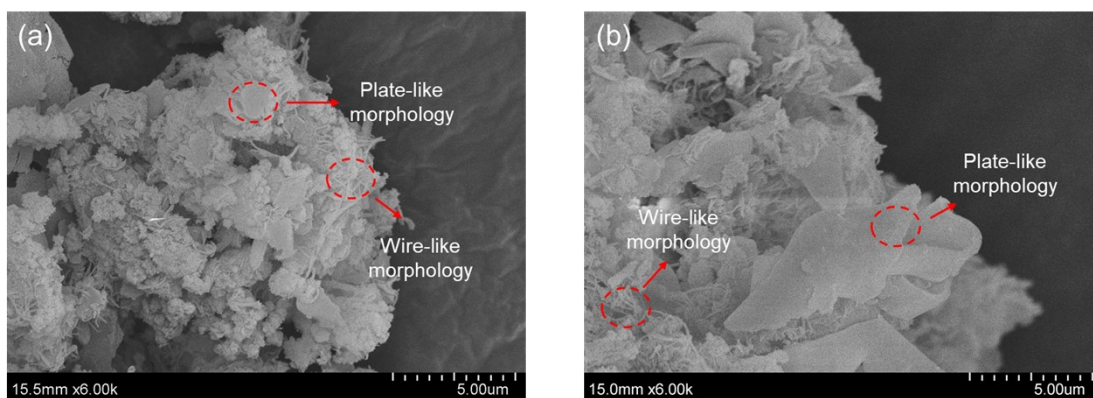

**Fig. S2** SEM images of (a) I-Ni-COF and (b) NQ-Ni-COF.

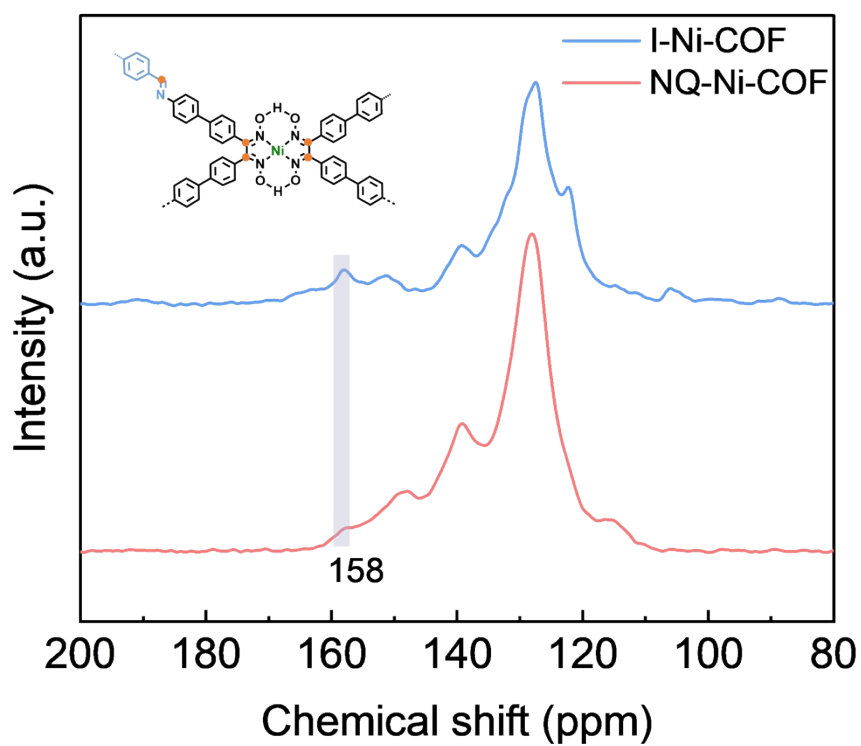

**Fig. S3** <sup>13</sup>C CP-MAS NMR spectra of I-Ni-COF and NQ-Ni-COF. The signal at 158 ppm in I-Ni-COF is ascribed to the imine carbon and oxime carbon.

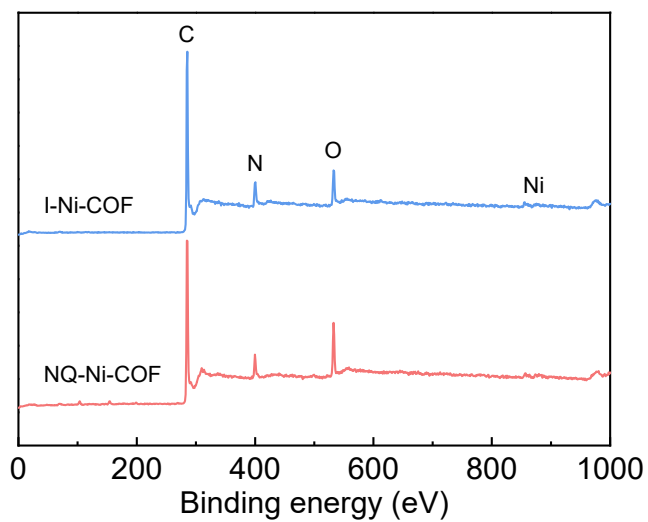

**Fig. S4** XPS survey spectra of I-Ni-COF and NQ-Ni-COF.

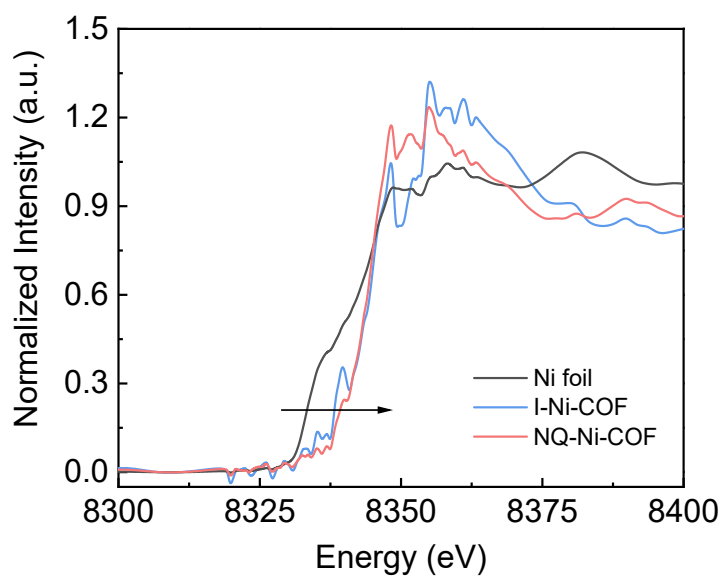

**Fig. S5** Ni K-edge XANES spectra of Ni foil, I-Ni-COF, and NQ-Ni-COF.

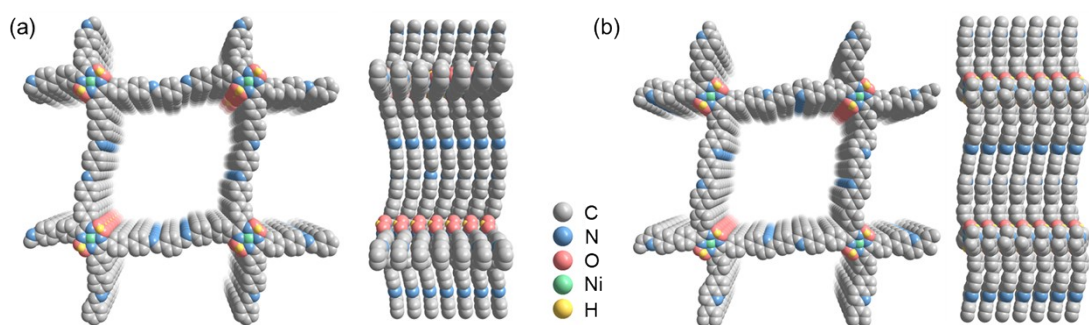

**Fig. S6** Top and side views of the simulated structures of (a) I-Ni-COF and (b) NQ-Ni-COF with the eclipsed AA stacking models.

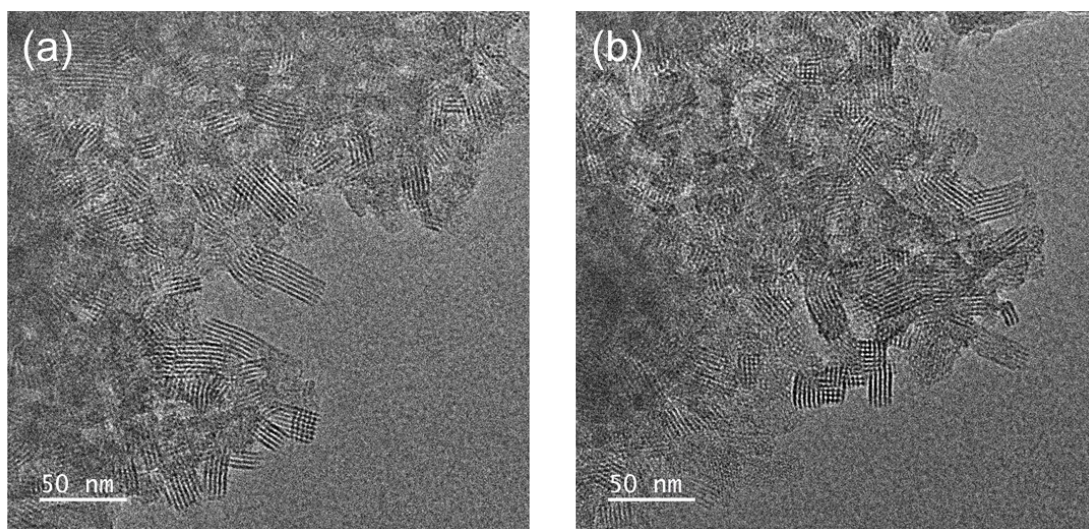

**Fig. S7** HRTEM images of I-Ni-COF.

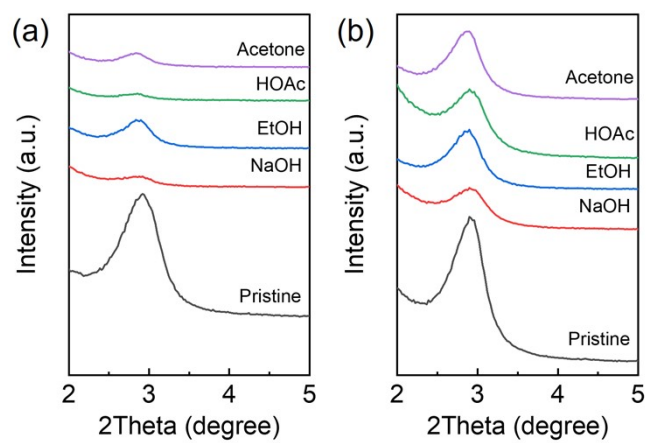

**Fig S8.** PXRD patterns of I-Ni-COF (a) and NQ-Ni-COF (b) treated in different chemical environments for 12 hours.

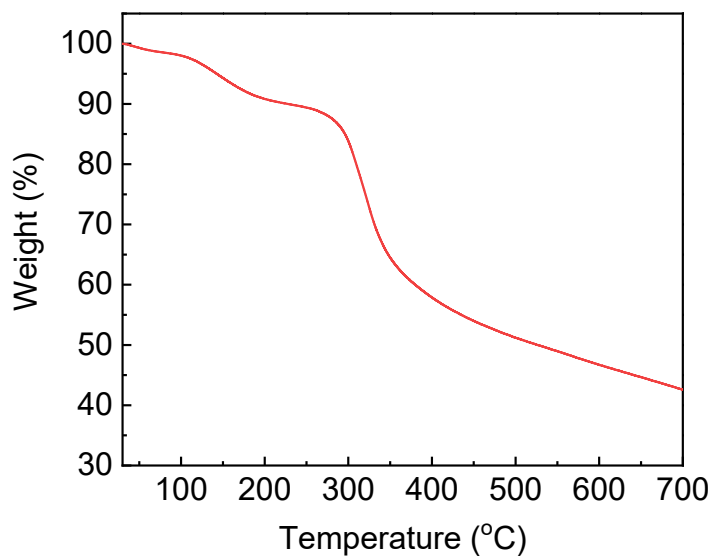

**Fig. S9** Thermogravimetric curve of NQ-Ni-COF.

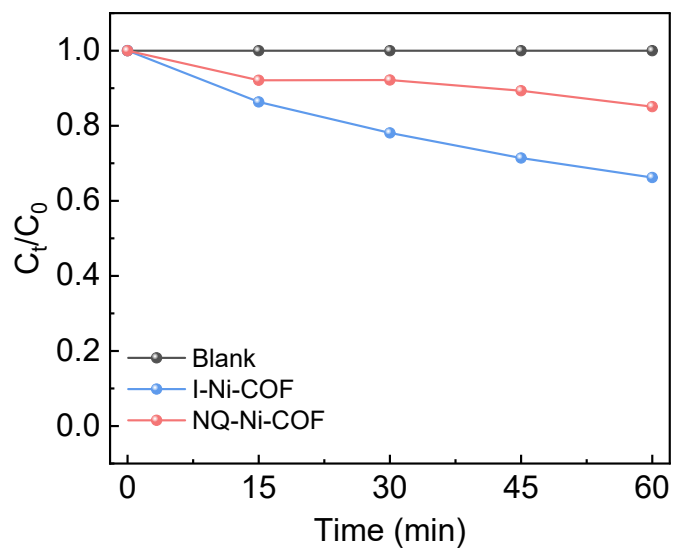

**Fig. S10** Adsorption behaviors of I-Ni-COF and NQ-Ni-COF under dark conditions.

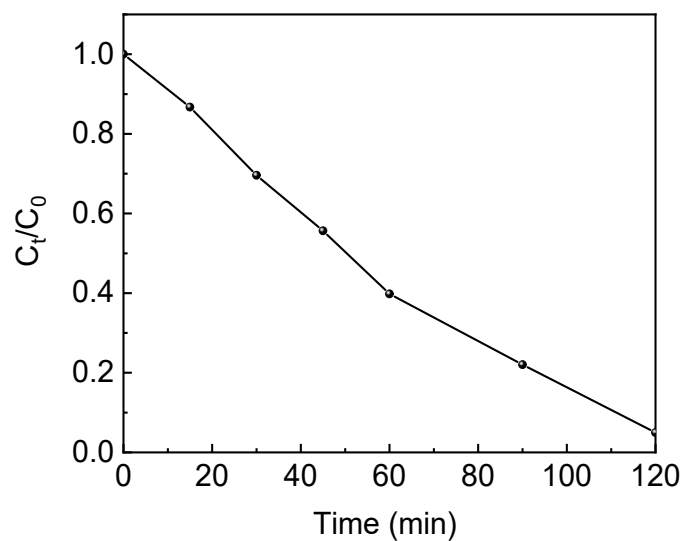

**Fig. S11** CIP degradation curve over the NQ-Ni-COF photocatalyst in actual wastewater.

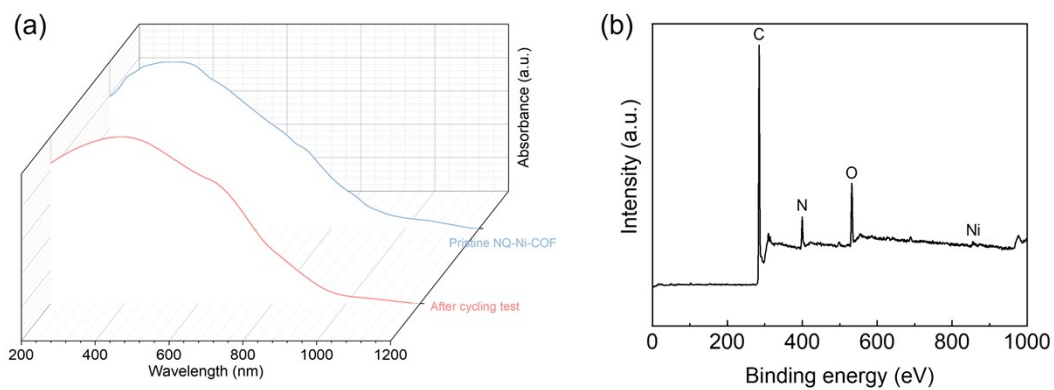

**Fig. S12** (a) UV-vis DRS spectra of NQ-Ni-COF before and after cycling test. (b) XPS spectrum of NQ-Ni-COF after cycling test.

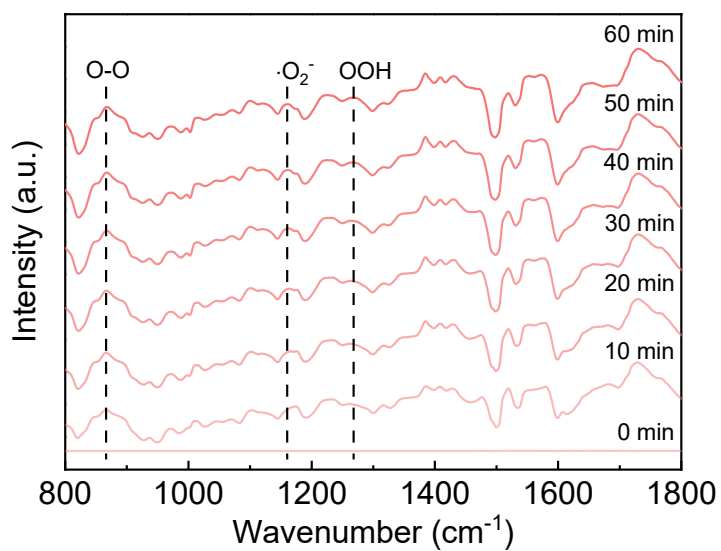

**Fig. S13** *In situ* DRIFT spectra recorded during photocatalytic O<sub>2</sub> activation for NQ-Ni-COF.

**Table S1.** Atomistic coordinates of AA stacking for I-Ni-COF.

| <b>Atom</b> | <b><math>x/a</math></b> | <b><math>y/b</math></b> | <b><math>z/c</math></b> |
|-------------|-------------------------|-------------------------|-------------------------|
| C1          | 0.56499                 | 0.52321                 | 0.79713                 |
| C2          | 0.58889                 | 0.48783                 | 0.91807                 |
| C3          | 0.63334                 | 0.48734                 | 0.8779                  |
| C4          | 0.65459                 | 0.52279                 | 0.72355                 |
| C5          | 0.63052                 | 0.55786                 | 0.60285                 |
| C6          | 0.58656                 | 0.55793                 | 0.63854                 |
| C7          | 0.70157                 | 0.52493                 | 0.69875                 |
| C8          | 0.51865                 | 0.52789                 | 0.86996                 |
| C9          | 0.48468                 | 0.49301                 | 0.87757                 |
| C10         | 0.48948                 | 0.44639                 | 0.78675                 |
| C11         | 0.45506                 | 0.41889                 | 0.85324                 |
| C12         | 0.45671                 | 0.37559                 | 0.76442                 |
| C13         | 0.49328                 | 0.35781                 | 0.60775                 |
| C14         | 0.52836                 | 0.38475                 | 0.54121                 |
| C15         | 0.52623                 | 0.42874                 | 0.62778                 |
| C16         | 0.49331                 | 0.31155                 | 0.5115                  |
| N17         | 0.50277                 | 0.56575                 | 0.94257                 |
| N18         | 0.44728                 | 0.50879                 | 0.96041                 |
| O19         | 0.40766                 | 0.49035                 | 0.9317                  |
| O20         | 0.52081                 | 0.60583                 | 0.90954                 |
| Ni21        | 0.44637                 | 0.5659                  | 0.9437                  |
| H22         | 0.50302                 | 0.62627                 | 1.12402                 |
| H23         | 0.38784                 | 0.5082                  | 1.14952                 |
| N24         | 0.4456                  | 0.6227                  | 0.89359                 |
| N25         | 0.39006                 | 0.56584                 | 0.91001                 |
| C26         | 0.40887                 | 0.63709                 | 0.77787                 |
| C27         | 0.37487                 | 0.60235                 | 0.7912                  |
| C28         | 0.40479                 | 0.68193                 | 0.63734                 |
| C29         | 0.32932                 | 0.60545                 | 0.68491                 |
| C30         | 0.44139                 | 0.70307                 | 0.51203                 |
| C31         | 0.44045                 | 0.74608                 | 0.41033                 |
| C32         | 0.40262                 | 0.76963                 | 0.43014                 |
| C33         | 0.36542                 | 0.74862                 | 0.54696                 |
| C34         | 0.36663                 | 0.70515                 | 0.64951                 |
| C35         | 0.3033                  | 0.63978                 | 0.79341                 |
| C36         | 0.25905                 | 0.63784                 | 0.74353                 |
| C37         | 0.2401                  | 0.601                   | 0.59118                 |
| C38         | 0.26632                 | 0.56714                 | 0.47831                 |
| C39         | 0.31012                 | 0.56942                 | 0.52459                 |
| C40         | 0.40338                 | 0.81634                 | 0.35048                 |
| C41         | 0.1933                  | 0.59572                 | 0.57352                 |

|     |         |          |         |
|-----|---------|----------|---------|
| O42 | 0.48531 | 0.64113  | 0.87767 |
| O43 | 0.3721  | 0.52556  | 0.90569 |
| C44 | 0.44208 | 0.83643  | 0.26305 |
| C45 | 0.44429 | 0.88079  | 0.21543 |
| C46 | 0.40769 | 0.90615  | 0.25364 |
| C47 | 0.36882 | 0.88631  | 0.33412 |
| C48 | 0.36663 | 0.8417   | 0.38256 |
| C49 | 0.16551 | 0.62991  | 0.64993 |
| C50 | 0.1214  | 0.62329  | 0.6529  |
| C51 | 0.10456 | 0.58244  | 0.58268 |
| C52 | 0.13229 | 0.5484   | 0.50291 |
| C53 | 0.17608 | 0.55505  | 0.4981  |
| C54 | 0.45483 | 0.28874  | 0.51882 |
| C55 | 0.45363 | 0.24508  | 0.43878 |
| C56 | 0.49104 | 0.22293  | 0.34897 |
| C57 | 0.52965 | 0.24544  | 0.3383  |
| C58 | 0.53081 | 0.28957  | 0.41801 |
| C59 | 0.72729 | 0.48876  | 0.76193 |
| C60 | 0.77171 | 0.49215  | 0.74173 |
| C61 | 0.79081 | 0.53189  | 0.65993 |
| C62 | 0.76525 | 0.56776  | 0.59806 |
| C63 | 0.72116 | 0.56432  | 0.61648 |
| N64 | 0.83593 | 0.53726  | 0.64086 |
| N65 | 0.49033 | 0.17752  | 0.28125 |
| C66 | 0.45494 | 0.15603  | 0.283   |
| C67 | 0.45311 | 0.1094   | 0.23206 |
| C68 | 0.41349 | 0.08916  | 0.25432 |
| C69 | 0.4105  | 0.04447  | 0.23079 |
| C70 | 0.44726 | 0.01963  | 0.18382 |
| C71 | 0.48689 | 0.0399   | 0.15702 |
| C72 | 0.4899  | 0.08467  | 0.18129 |
| C73 | 0.44534 | -0.02742 | 0.18424 |
| C74 | 0.86316 | 0.50616  | 0.6646  |
| C75 | 0.90895 | 0.51497  | 0.64499 |
| C76 | 0.93764 | 0.48067  | 0.63884 |
| C77 | 0.98138 | 0.48852  | 0.61858 |
| C78 | 0.99674 | 0.53069  | 0.60583 |
| C79 | 0.96806 | 0.56513  | 0.61285 |
| C80 | 0.92435 | 0.55728  | 0.63164 |
| C81 | 1.04276 | 0.53771  | 0.58628 |
| N82 | 1.05949 | 0.5758   | 0.60148 |
| N83 | 0.40983 | -0.04792 | 0.23326 |

---

**Table S2.** Atomistic coordinates of AA stacking for NQ-Ni-COF.

| <b>Atom</b> | <b><math>x/a</math></b> | <b><math>y/b</math></b> | <b><math>z/c</math></b> |
|-------------|-------------------------|-------------------------|-------------------------|
| C1          | 0.5954                  | 0.4894                  | 0.157                   |
| C2          | 0.622                   | 0.4552                  | 0.2631                  |
| C3          | 0.6663                  | 0.4586                  | 0.2297                  |
| C4          | 0.6849                  | 0.4967                  | 0.0931                  |
| C5          | 0.6582                  | 0.5303                  | -0.0226                 |
| C6          | 0.6142                  | 0.5266                  | 0.0088                  |
| C7          | 0.7316                  | 0.5036                  | 0.1                     |
| C8          | 0.5492                  | 0.4907                  | 0.2458                  |
| C9          | 0.5169                  | 0.4538                  | 0.2463                  |
| C10         | 0.5242                  | 0.4069                  | 0.1809                  |
| C11         | 0.4898                  | 0.3819                  | 0.0582                  |
| C12         | 0.4914                  | 0.337                   | 0.0633                  |
| C13         | 0.528                   | 0.3157                  | 0.1874                  |
| C14         | 0.5634                  | 0.3403                  | 0.2945                  |
| C15         | 0.5613                  | 0.3856                  | 0.2935                  |
| C16         | 0.5264                  | 0.2688                  | 0.2538                  |
| N17         | 0.5311                  | 0.5276                  | 0.3248                  |
| N18         | 0.4789                  | 0.4675                  | 0.3341                  |
| O19         | 0.4415                  | 0.4453                  | 0.3944                  |
| O20         | 0.5478                  | 0.5684                  | 0.3661                  |
| Ni21        | 0.4765                  | 0.5233                  | 0.4343                  |
| H22         | 0.5241                  | 0.5902                  | 0.2077                  |
| H23         | 0.4303                  | 0.4571                  | 0.6804                  |
| N24         | 0.4742                  | 0.579                   | 0.5372                  |
| N25         | 0.422                   | 0.5189                  | 0.5472                  |
| C26         | 0.4366                  | 0.5922                  | 0.6429                  |
| C27         | 0.4043                  | 0.5555                  | 0.6414                  |
| C28         | 0.43                    | 0.6383                  | 0.743                   |
| C29         | 0.3584                  | 0.5568                  | 0.7397                  |
| C30         | 0.4646                  | 0.6615                  | 0.8857                  |
| C31         | 0.4628                  | 0.7061                  | 0.9273                  |
| C32         | 0.4262                  | 0.729                   | 0.8272                  |
| C33         | 0.3908                  | 0.706                   | 0.6954                  |
| C34         | 0.3929                  | 0.661                   | 0.6518                  |
| C35         | 0.3317                  | 0.591                   | 0.6364                  |
| C36         | 0.2874                  | 0.5875                  | 0.6748                  |
| C37         | 0.2691                  | 0.5494                  | 0.8132                  |
| C38         | 0.2959                  | 0.5158                  | 0.9255                  |
| C39         | 0.3399                  | 0.5195                  | 0.889                   |
| C40         | 0.427                   | 0.7769                  | 0.8305                  |
| C41         | 0.2224                  | 0.5425                  | 0.8103                  |

---

|     |        |         |        |
|-----|--------|---------|--------|
| O42 | 0.512  | 0.6009  | 0.4942 |
| O43 | 0.4057 | 0.4778  | 0.5219 |
| C44 | 0.466  | 0.7984  | 0.8755 |
| C45 | 0.4684 | 0.8432  | 0.8496 |
| C46 | 0.4314 | 0.8676  | 0.7785 |
| C47 | 0.3923 | 0.8465  | 0.7383 |
| C48 | 0.3902 | 0.8013  | 0.7625 |
| C49 | 0.1942 | 0.5754  | 0.7022 |
| C50 | 0.1506 | 0.5669  | 0.6702 |
| C51 | 0.1348 | 0.5251  | 0.743  |
| C52 | 0.1626 | 0.4926  | 0.856  |
| C53 | 0.2059 | 0.5013  | 0.889  |
| C54 | 0.4871 | 0.2494  | 0.3354 |
| C55 | 0.4842 | 0.2051  | 0.3939 |
| C56 | 0.5209 | 0.179   | 0.3709 |
| C57 | 0.5601 | 0.198   | 0.2837 |
| C58 | 0.5628 | 0.2426  | 0.2234 |
| C59 | 0.7596 | 0.4707  | 0.2104 |
| C60 | 0.8032 | 0.4792  | 0.245  |
| C61 | 0.8191 | 0.521   | 0.1729 |
| C62 | 0.7915 | 0.5535  | 0.0582 |
| C63 | 0.7481 | 0.5449  | 0.0224 |
| N64 | 0.861  | 0.5298  | 0.2221 |
| N65 | 0.5179 | 0.1358  | 0.4328 |
| N66 | 0.4342 | 0.9112  | 0.74   |
| N67 | 0.0929 | 0.5163  | 0.6956 |
| C68 | 0.48   | 0.1165  | 0.5149 |
| C69 | 0.478  | 0.0694  | 0.5817 |
| C70 | 0.4386 | 0.0484  | 0.6186 |
| C71 | 0.4368 | 0.0039  | 0.68   |
| C72 | 0.4743 | -0.0204 | 0.708  |
| C73 | 0.5137 | 0.0007  | 0.6723 |
| C74 | 0.5155 | 0.0452  | 0.6093 |
| C75 | 0.8891 | 0.4991  | 0.3383 |
| C76 | 0.9341 | 0.5111  | 0.3991 |
| C77 | 0.9643 | 0.48    | 0.5029 |
| C78 | 1.0067 | 0.4918  | 0.5629 |
| C79 | 1.0196 | 0.535   | 0.521  |
| C80 | 0.9894 | 0.566   | 0.4173 |
| C81 | 0.9471 | 0.5541  | 0.3573 |
| C82 | 0.8745 | 0.457   | 0.4057 |
| C83 | 0.8315 | 0.4471  | 0.3591 |
| C84 | 0.443  | 0.1417  | 0.5356 |
| C85 | 0.4452 | 0.1861  | 0.4754 |

---

|     |        |        |        |
|-----|--------|--------|--------|
| C86 | 0.4722 | 0.9324 | 0.7666 |
| C87 | 0.0647 | 0.5469 | 0.5807 |
| C88 | 0.5095 | 0.9089 | 0.8399 |
| C89 | 0.5074 | 0.8642 | 0.8821 |
| C90 | 0.0792 | 0.5891 | 0.513  |
| C91 | 0.1223 | 0.599  | 0.5578 |

**Table S3.** The chemical composition of NQ-Ni-COF before and after cycling test.

|        | C (at%) | N (at%) | O (at%) | Ni (at%) |
|--------|---------|---------|---------|----------|
| Before | 80.81   | 8.38    | 10.21   | 0.60     |
| After  | 81.13   | 8.25    | 10.10   | 0.51     |

**Table S4.** Mass spectrometry piece information and proposed structure of intermediate products in the catalytic degradation of CIP by NQ-Ni-COF.

| Intermediate products | ESI (+) MS ( <i>m/z</i> ) | Molecular Formula                                              | Supposed Structure |
|-----------------------|---------------------------|----------------------------------------------------------------|--------------------|
| CIP                   | 332                       | C <sub>17</sub> H <sub>18</sub> FN <sub>3</sub> O <sub>3</sub> |                    |
| A                     | 330                       | C <sub>17</sub> H <sub>19</sub> N <sub>3</sub> O <sub>4</sub>  |                    |
| B                     | 359                       | C <sub>17</sub> H <sub>17</sub> N <sub>3</sub> O <sub>6</sub>  |                    |
| C                     | 306                       | C <sub>15</sub> H <sub>19</sub> N <sub>3</sub> O <sub>4</sub>  |                    |
| D                     | 212                       | C <sub>9</sub> H <sub>13</sub> N <sub>3</sub> O <sub>3</sub>   |                    |
| E                     | 362                       | C <sub>17</sub> H <sub>16</sub> FN <sub>3</sub> O <sub>5</sub> |                    |
| F                     | 334                       | C <sub>16</sub> H <sub>16</sub> FN <sub>3</sub> O <sub>4</sub> |                    |
| G                     | 306                       | C <sub>15</sub> H <sub>16</sub> FN <sub>3</sub> O <sub>3</sub> |                    |
| H                     | 318                       | C <sub>16</sub> H <sub>16</sub> FN <sub>3</sub> O <sub>3</sub> |                    |
| I                     | 290                       | C <sub>15</sub> H <sub>16</sub> FN <sub>3</sub> O <sub>2</sub> |                    |
| J                     | 274                       | C <sub>15</sub> H <sub>16</sub> FN <sub>3</sub> O              |                    |

#### 4. Copies of NMR spectra

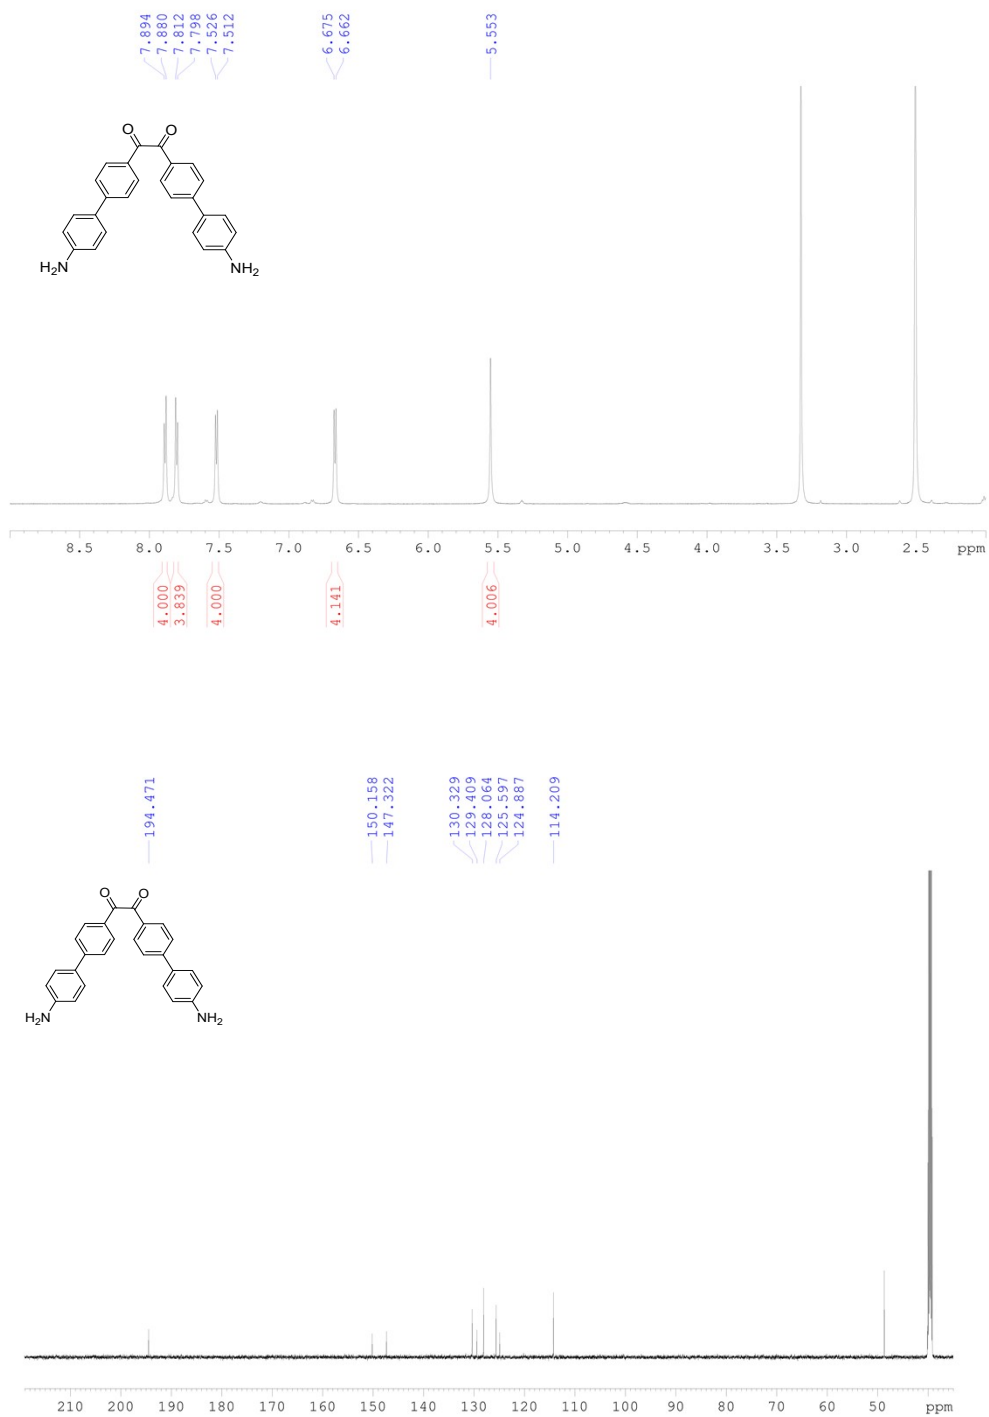

**Fig. S14** <sup>1</sup>H NMR and <sup>13</sup>C NMR spectra of S3.

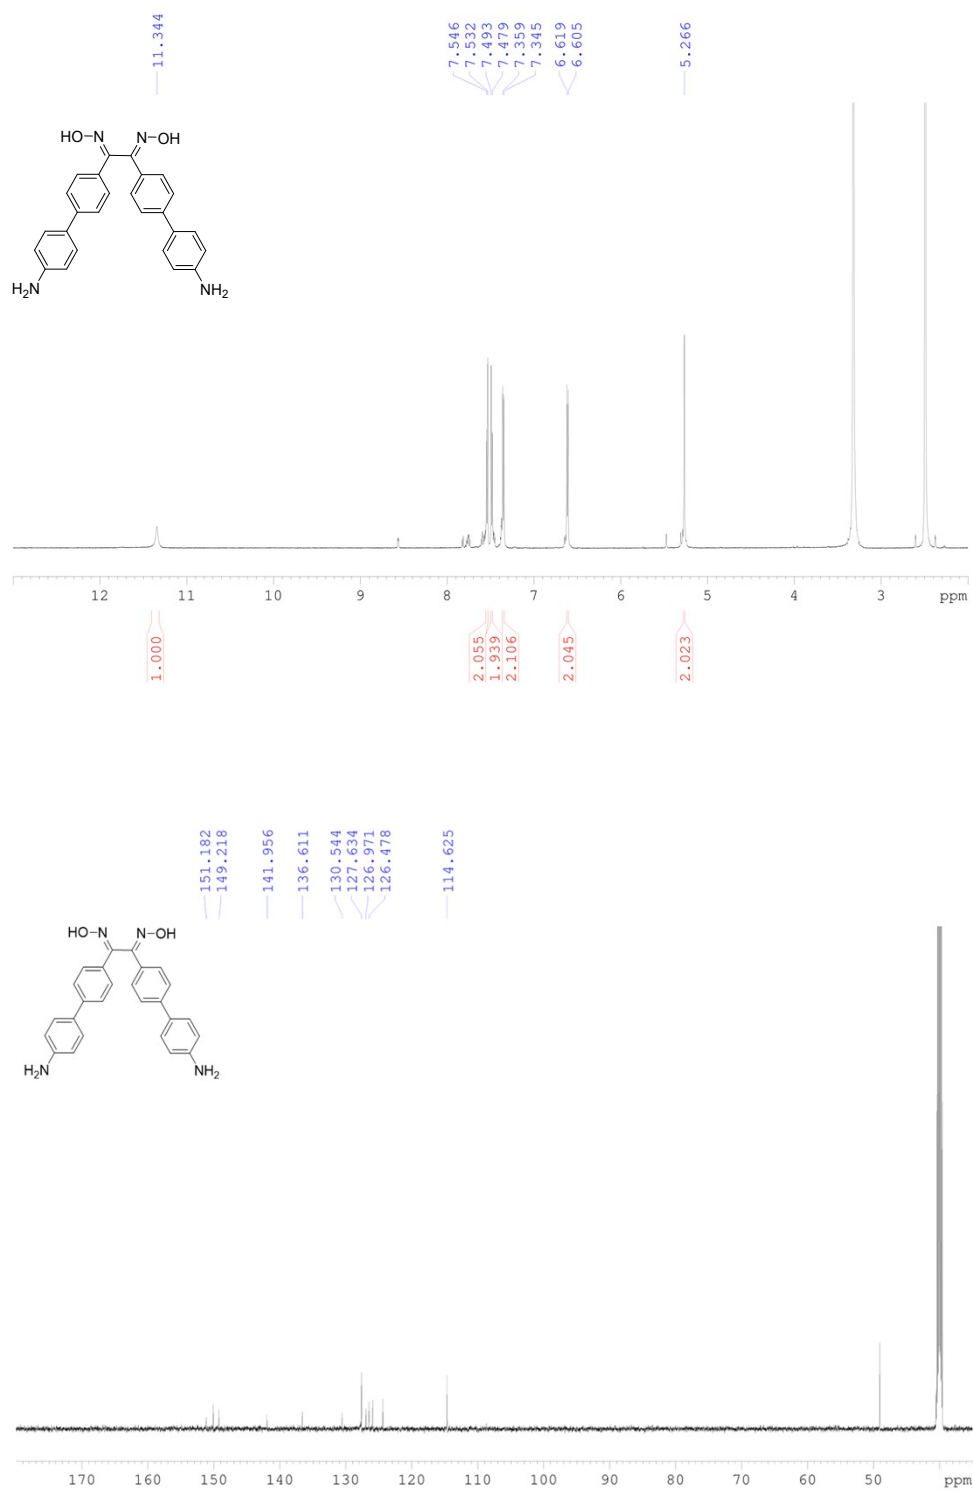

Fig. S15 <sup>1</sup>H NMR and <sup>13</sup>C NMR spectra of S4.

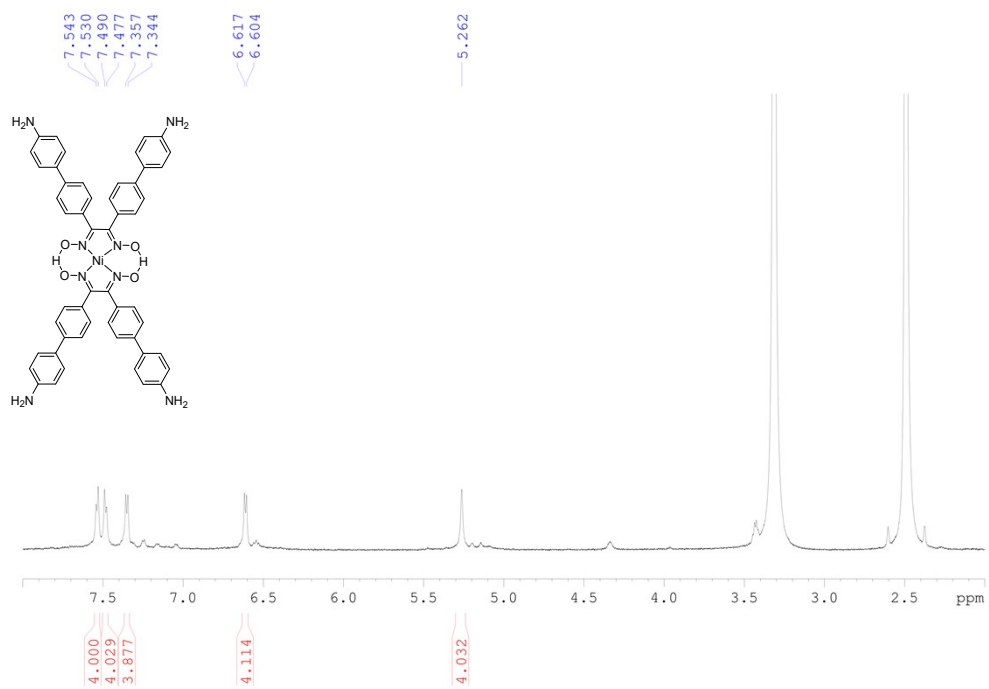

**Fig. S16** <sup>1</sup>H NMR spectra of S5.
